# Supplementary material for: Challenges facing the veterinary profession in Ireland: 2. On-farm use of veterinary antimicrobials
Source: PubMed Central journal article supplement (PMC5602862; doi:10.1186/s13620-017-0106-9), 2017-09-15
Supplement: 13620_2017_106_MOESM1_ESM.pdf [file 13620_2017_106_MOESM1_ESM.pdf]

210 min (3.5 hours)

## Interview Guide - FOCUS GROUPS VAM

TECHNICAL

10.30 am

### MORNING SESSION

|   |                                                                                                                                                                |                                                                                                                                                                                                                                                                                                                                                                                                                                                                                                                                                                                                                                                    |                                                                                         |
|---|----------------------------------------------------------------------------------------------------------------------------------------------------------------|----------------------------------------------------------------------------------------------------------------------------------------------------------------------------------------------------------------------------------------------------------------------------------------------------------------------------------------------------------------------------------------------------------------------------------------------------------------------------------------------------------------------------------------------------------------------------------------------------------------------------------------------------|-----------------------------------------------------------------------------------------|
| 1 | <p><u>Introductions</u><br/>           Explain the purposes of the focus group<br/>           Privacy, Anonymity, informed consent</p> <p>(10 min - 10.40)</p> | <p>Thank participants for coming.</p>                                                                                                                                                                                                                                                                                                                                                                                                                                                                                                                                                                                                              | <p>Place of interview:</p> <hr/> <p>Date:</p> <hr/> <p>Time:</p> <hr/> <p>Duration:</p> |
|   |                                                                                                                                                                | <p>Present Information Sheet (in case participants haven't read it and ask for queries)<br/>           Ask for signed consent forms (bring additional copies)<br/>           The recorded tapes will be used for analysis only. Transcripts Personal data will not be used.<br/>           Demographic data will not be reported in such a way that your identity can be revealed.</p>                                                                                                                                                                                                                                                             |                                                                                         |
| 2 | <p><b>Introductions (20 min - 11.00)</b></p>                                                                                                                   | <p>Let participants introduce themselves to create familiarity.</p>                                                                                                                                                                                                                                                                                                                                                                                                                                                                                                                                                                                |                                                                                         |
| 3 | <p><b>Icebreaker</b><br/>           (30 min - 11.30)</p>                                                                                                       | <p>'Ice-breaker' - list 3 challenges associated with the use of antibiotics in vet/human* medicine? Participants will be asked to write their list onto post-its, without discussing with other participants.<br/>           The facilitator will then go around the table to ask each participant to list their issues.</p>                                                                                                                                                                                                                                                                                                                       |                                                                                         |
| 4 | <p><b>Practical ethical dilemma<br/>           Framing the Issues (Facts)</b><br/>           (60 min. - 12.30)</p>                                             | <p><u>Vignette:</u> Joan routinely prescribes broad spectrum antibiotics (injectable and tubes) to a dairy farmer with a large herd of 300 animals in Co. Cork. The herd has a low record of somatic cell count (&lt; 100 000 cells/mL). Every dry cow gets a tube and most cows are injected. "The preventive use of antibiotics has made this farm one of the best in Ireland – at the end that's good for the animals, and cheaper for the farmer."<br/>           How does this case relates with challenges hitherto identified?<br/>           Who should take responsibility for the prescription and administration of antimicrobials?</p> |                                                                                         |

13.30 pm

### AFTERNOON SESSION

|   |                                                                               |                                                                                                                                                                                                                                                                                                                                                                                     |
|---|-------------------------------------------------------------------------------|-------------------------------------------------------------------------------------------------------------------------------------------------------------------------------------------------------------------------------------------------------------------------------------------------------------------------------------------------------------------------------------|
| 5 | <p><b>Exploring barriers to solutions</b><br/>           (35 min - 14.05)</p> | <p>Individually: Write on card the answer to the question: What are the barriers to preventing responsible prescription and use of veterinary antimicrobials?<br/> <u>Group discussion:</u> <i>Why is that? What do you mean by that? Do you all agree with this view?</i></p>                                                                                                      |
| 6 | <p><b>Exploring Possible Solutions</b><br/>           (45 min - 14.50)</p>    | <p><u>Collective exercise:</u> In your experience, what strategies could be adopted to improve the responsible prescription and use of antimicrobials?<br/> <u>Group Discussion:</u> who should take the responsibility in dealing with responsible prescription of AB?<br/>           who should take the responsibility in dealing with the responsible administration of AB?</p> |
| 7 | <p><b>Debriefing</b><br/>           (10 min - 15.00)</p>                      | <p>a. Finish with questions: <i>Are there any issues related to the ethics of ... that we have not dealt with ?</i><br/>           b. Is there anything else that you would like to talk about concerning this meeting?<br/>           c. Thank participants.</p>                                                                                                                   |
